# Supplementary material for: Detection of cancers and advanced adenomas in asymptomatic participants in colorectal cancer screening: a cross-sectional study
Source: HighWire-hosted journal article supplement (doi:10.1136/bmjopen-2020-048183), 2021-07-01
Supplement: bmjopen-2020-048183supp001_data_supplement.pdf [file bmjopen-2020-048183supp001_data_supplement.pdf]

## Supplementary tables

**Supplementary Table 1.** Positive predictive value of bowel symptoms for detecting colorectal cancer and advanced adenoma in the sigmoidoscopy group

|                        | PPV (%)<br>CRC | PPV (%)<br>Advanced adenoma* |
|------------------------|----------------|------------------------------|
| All participants       | 0.6            | 4.7                          |
| No symptom             | 0.4            | 4.6                          |
| Abdominal pain         | 0.4            | 4.3                          |
| Bloating               | 0.5            | 4.5                          |
| Change in bowel habits | 2.2            | 5.4                          |
| Constipation           | 0.5            | 3.4                          |
| Diarrhoea              | 1.3            | 6.3                          |
| Rectal bleeding        | 1.9            | 7.5                          |

PPV = positive predictive value. \* Individuals with colorectal cancer were excluded from this analysis

**Supplementary Table 2.** Multivariable analysis of the association between symptoms duration and detection of colorectal cancer or advanced adenoma in the sigmoidoscopy and FIT group

| Variable               | Comparison        | Sigmoidoscopy group       |                                  | FIT group               |                                  |
|------------------------|-------------------|---------------------------|----------------------------------|-------------------------|----------------------------------|
|                        |                   | CRC<br>OR (95% CI)        | Advanced adenoma*<br>OR (95% CI) | CRC<br>OR (95% CI)      | Advanced adenoma*<br>OR (95% CI) |
| Abdominal pain         | ≤ 6 months vs. No | 0.32 (0.04-2.37)          | 1.34 (0.83-2.15)                 | <b>4.58 (2.65-7.93)</b> | 1.05 (0.63-1.78)                 |
|                        | > 6 months vs. No | 0.60 (0.22-1.67)          | 0.83 (0.59-1.15)                 | 0.67 (0.31-1.46)        | 0.77 (0.55-1.08)                 |
| Bloating               | ≤ 6 months vs. No | 1.75 (0.35-8.67)          | <b>2.75 (1.44-5.28)</b>          | 0.82 (.019-3.66)        | 0.53 (0.20-1.44)                 |
|                        | > 6 months vs. No | 0.47 (0.15-1.49)          | 0.76 (0.54-1.08)                 | 0.76 (0.28-2.09)        | 1.08 (0.71-1.63)                 |
| Change in bowel habits | ≤ 6 months vs. No | <b>3.05 (1.45-6.40)</b>   | 0.89 (0.54-1.46)                 | <b>2.28 (1.21-4.27)</b> | 0.73 (0.44-1.21)                 |
|                        | > 6 months vs. No | <b>3.34 (1.77-6.29)</b>   | 1.23 (0.86-1.74)                 | 1.50 (0.74-3.04)        | 1.09 (0.73-1.63)                 |
| Constipation           | ≤ 6 months vs. No | 2.50 (0.84-7.48)          | 1.09 (0.50-2.37)                 | 0.21 (0.03-1.57)        | 1.12 (0.60-2.07)                 |
|                        | > 6 months vs. No | 0.30 (0.07-1.23)          | 0.66 (0.46-0.95)                 | 0.84 (0.42-1.69)        | <b>0.67 (0.47-0.95)</b>          |
| Diarrhoea              | ≤ 6 months vs. No | 2.68 (0.93-7.75)          | <b>2.19 (1.25-3.83)</b>          | 0.64 (0.19-2.15)        | <b>0.32 (0.11-0.93)</b>          |
|                        | > 6 months vs. No | 1.26 (0.46-3.46)          | 1.16 (0.79-1.72)                 | 0.18 (0.03-1.31)        | <b>0.56 (0.34-0.92)</b>          |
| Rectal bleeding        | ≤ 6 months vs. No | <b>10.15 (5.84-17.64)</b> | <b>2.09 (1.41-3.10)</b>          | <b>2.75 (1.66-4.57)</b> | 1.26 (0.96-1.92)                 |
|                        | > 6 months vs. No | <b>3.33 (2.21-5.01)</b>   | <b>1.73 (1.45-2.07)</b>          | <b>1.65 (1.22-2.21)</b> | <b>0.83 (0.70-0.98)</b>          |

FIT = faecal immunochemical test. \*Individuals with colorectal cancer were excluded from this analysis. Adjusted for all listed symptoms and age and sex.

**Supplementary Table 3.** Sensitivity, specificity, and positive predictive value of bowel symptoms for detecting colorectal cancer in the FIT group

|                        | Sensitivity % | Specificity % | PPV % |
|------------------------|---------------|---------------|-------|
| All participants       | -             | -             | 4.6   |
| No symptom             | -             | -             | 3.9   |
| Abdominal pain         | 9.0           | 94.9          | 7.9   |
| Bloating               | 2.0           | 97.5          | 3.8   |
| Change in bowel habits | 8.4           | 96.2          | 9.6   |
| Constipation           | 3.3           | 95.6          | 3.6   |
| Diarrhoea              | 1.7           | 97.4          | 3.0   |
| Rectal bleeding        | 27.8          | 82.0          | 6.9   |

PPV = positive predictive value. CRC = colorectal cancer. FIT = faecal immunochemical test.
